# Supplementary material for: Unravelling the microhydration frameworks of prototype PAH by infrared spectroscopy: naphthalene–(water)1–3
Source: Royal Society of Chemistry journal article supplement (doi:10.1039/d1cp01789f), 2021-01-01
Supplement: d1cp01789f1.pdf [file d1cp01789f1.pdf]

## Electronic Supporting Information

### Unravelling the Microhydration Frameworks of Prototype PAH by Infrared Spectroscopy: Naphthalene-(Water)<sub>1-3</sub>

Kuntal Chatterjee, Tarun Kumar Roy, Jai Khatri, Gerhard Schwaab, and Martina Havenith\*

Lehrstuhl für Physikalische Chemie II, Ruhr-Universität Bochum, 44801 Bochum, Germany.

\* Corresponding author: E-Mail: martina.havenith@rub.de

**Table S1** Comparison of calculated (MP2/6-311++G(d,p)) and experimental geometrical parameters (in Å and degrees) for neutral naphthalene.

|         | Np (calculated) | Np (experiment) <sup>a</sup> | Np(experiment) <sup>b</sup> |
|---------|-----------------|------------------------------|-----------------------------|
| C9-C10  | 1.4356          | 1.412 (8)                    | 1.421                       |
| C9-C1   | 1.4221          | 1.422 (3)                    | 1.424                       |
| C1-C2   | 1.3834          | 1.381 (2)                    | 1.377                       |
| C2-C3   | 1.4180          | 1.417 (4)                    | 1.411                       |
| C1-H    | 1.0884          | 1.092 (1)                    | 1.095                       |
| C2-H    | 1.0870          | 1.092 (1)                    | 1.098                       |
| C1C9C10 | 118.9           | 119.5 (3)                    | 119.0                       |
| C9C1C2  | 120.7           |                              | 120.2                       |
| C1C2C3  | 120.3           |                              | 120.5                       |
| HC1C9   | 118.8           |                              | 117.0                       |
| HC2C1   | 119.9           |                              | 119.9                       |

<sup>a</sup> Experimental geometrical parameters from gas-phase electron diffraction measurements (S. N. Ketkar, M. Fink, *J. Mol. Struct.*, 1981, **77**, 139-147).

<sup>b</sup> Experimental geometrical parameters from condensed-phase X-ray diffraction (V. I. Ponomarev, O. S. Filipenko, L. O. Atovmyan, *Kristallografiya*, 1976, **21**, 392-394).

**Table S2** Selected vibrational parameters of D<sub>2</sub>O monomer, Np-D<sub>2</sub>O( $\pi$ ), Np-D<sub>2</sub>O(18), Np-D<sub>2</sub>O(12), and Np-D<sub>2</sub>O(23) isomers computed at the MP2/6-311++G(d,p)

|                                          | D <sub>2</sub> O | Np-D <sub>2</sub> O( $\pi$ ) | Np-D <sub>2</sub> O(18) | Np-D <sub>2</sub> O(23) | Np-D <sub>2</sub> O(12) |
|------------------------------------------|------------------|------------------------------|-------------------------|-------------------------|-------------------------|
| $\nu_1$ (cm <sup>-1</sup> ) <sup>a</sup> | 2668.1 (9)       | 2651.2 (17)                  | 2655.5 (11)             | 2659.1 (12)             | 2658.5 (11)             |
| $\nu_3$ (cm <sup>-1</sup> ) <sup>a</sup> | 2791.5 (38)      | 2762.9 (13)                  | 2779.6 (44)             | 2782.6 (43)             | 2782.3 (43)             |

<sup>a</sup> Values in parentheses are IR intensities in km/mol

## 1. Pickup Curves

The cluster composition of  $(\text{Np})_m(\text{D}_2\text{O})_n$  and  $(\text{Np})_m(\text{CH}_3\text{OD})_n$  complexes inside helium droplets at the observed experimental vibrational resonances is evaluated by varying the partial pressure of a particular dopant molecule, while keeping the partial pressure of the other dopant fixed at a constant partial pressure. This results in pressure-dependent IR intensity variation, typically known as pickup curves, which follows Poisson statistics.<sup>a</sup> From this statistics, the probability ( $P_k$ ) of capturing  $k$  dopant molecule(s) is as follows:

$$P_k = \frac{(\sigma\rho l)^k}{k!} \exp(-\sigma\rho l) \quad (1),$$

where  $\sigma$  is the pickup cross-section of the droplets,  $\rho$  is the number density of the dopant molecules, and  $l$  is the length of the pickup region.

We record the pickup curves of  $\text{D}_2\text{O}$  by fixing the laser frequency at the observed bands (Table 1), and the Np partial pressure ( $p_{\text{Np}}$ ) is fixed at  $3.0 \times 10^{-6}$  mbar (Figure S1). The  $\text{D}_2\text{O}$  pressure-dependent IR intensity, recorded at  $m/z$  128, exhibits a rising edge at a partial pressure of  $\sim 3.5 \times 10^{-6}$  mbar. The reference  $\text{D}_2\text{O}$  pickup curve at  $2762.3 \text{ cm}^{-1}$  is best fitted to a Poisson distribution for  $k=1$  (equation 1, Figure S1). The pickup curve recorded at  $2655.2 \text{ cm}^{-1}$  shows similar pressure dependency for  $\text{D}_2\text{O}$ , suggesting  $\text{D}_2\text{O}$  monomer contribution, while the pickup curves acquired at  $2755.1$ ,  $2750$ ,  $2643.7$ , and  $2590.4 \text{ cm}^{-1}$  follow a Poisson statistics of  $k=2$  and thus corresponds to  $\text{D}_2\text{O}$  dimer contribution. The remaining transitions at  $2747.3$ ,  $2745.4$ ,  $2704.3$ , and  $2592.2 \text{ cm}^{-1}$  are in agreement with a Poisson distribution of  $k=2$  leading to  $\text{D}_2\text{O}$  trimer contribution. Interestingly, for the band at  $2750 \text{ cm}^{-1}$  lying on the blue wing of the band at  $2747.3 \text{ cm}^{-1}$ , the  $\text{D}_2\text{O}$  pickup curve follows  $k=3$  distribution instead of  $k=2$  at higher pressure range ( $> 12 \times 10^{-6}$  mbar), which is justified by the contribution of  $\text{D}_2\text{O}$  trimer clusters associated with the latter vibrational transition.

In the same way, while recording the Np pickup curves (at  $m/z$  128),  $\text{D}_2\text{O}$  partial pressure ( $p_{\text{D}_2\text{O}}$ ) is kept constant. The reference Np pickup curve acquired at  $2762.3 \text{ cm}^{-1}$  follows  $k=1$  Poisson distribution and exhibits a rising edge at  $\sim 3.0 \times 10^{-6}$  mbar (Figure S2), while the  $\text{D}_2\text{O}$  partial pressure is fixed at  $\sim 3.5 \times 10^{-6}$  mbar (monomer). The Np pickup curve recorded at  $2655.2 \text{ cm}^{-1}$  exhibits similar pressure dependency. The Np pickup curves at  $2755.1$ ,  $2750$ ,  $2643.7$ , and  $2590.4 \text{ cm}^{-1}$  follow a  $k=1$  Poisson distribution, while fixing the  $p_{\text{D}_2\text{O}}$  at  $\sim 7 \times 10^{-6}$  mbar. A similar  $k=1$  Poisson distribution is observed for Np pickup curves recorded at the transitions at  $2747.3$ ,  $2745.4$ ,  $2704.3$ , and  $2592.2 \text{ cm}^{-1}$  (constant  $p_{\text{D}_2\text{O}} \sim 10.5 \times 10^{-6}$  mbar). Thus,  $(\text{Np})_m(\text{D}_2\text{O})_n$  clusters containing a single Np moiety, i.e.,  $m=1$  only contributes at each of the experimental bands.

<sup>a</sup> M. Lewerenz, B. Schilling, J. P. Toennies, *J. Chem. Phys.*, **1995**, 102, 8191-8207.

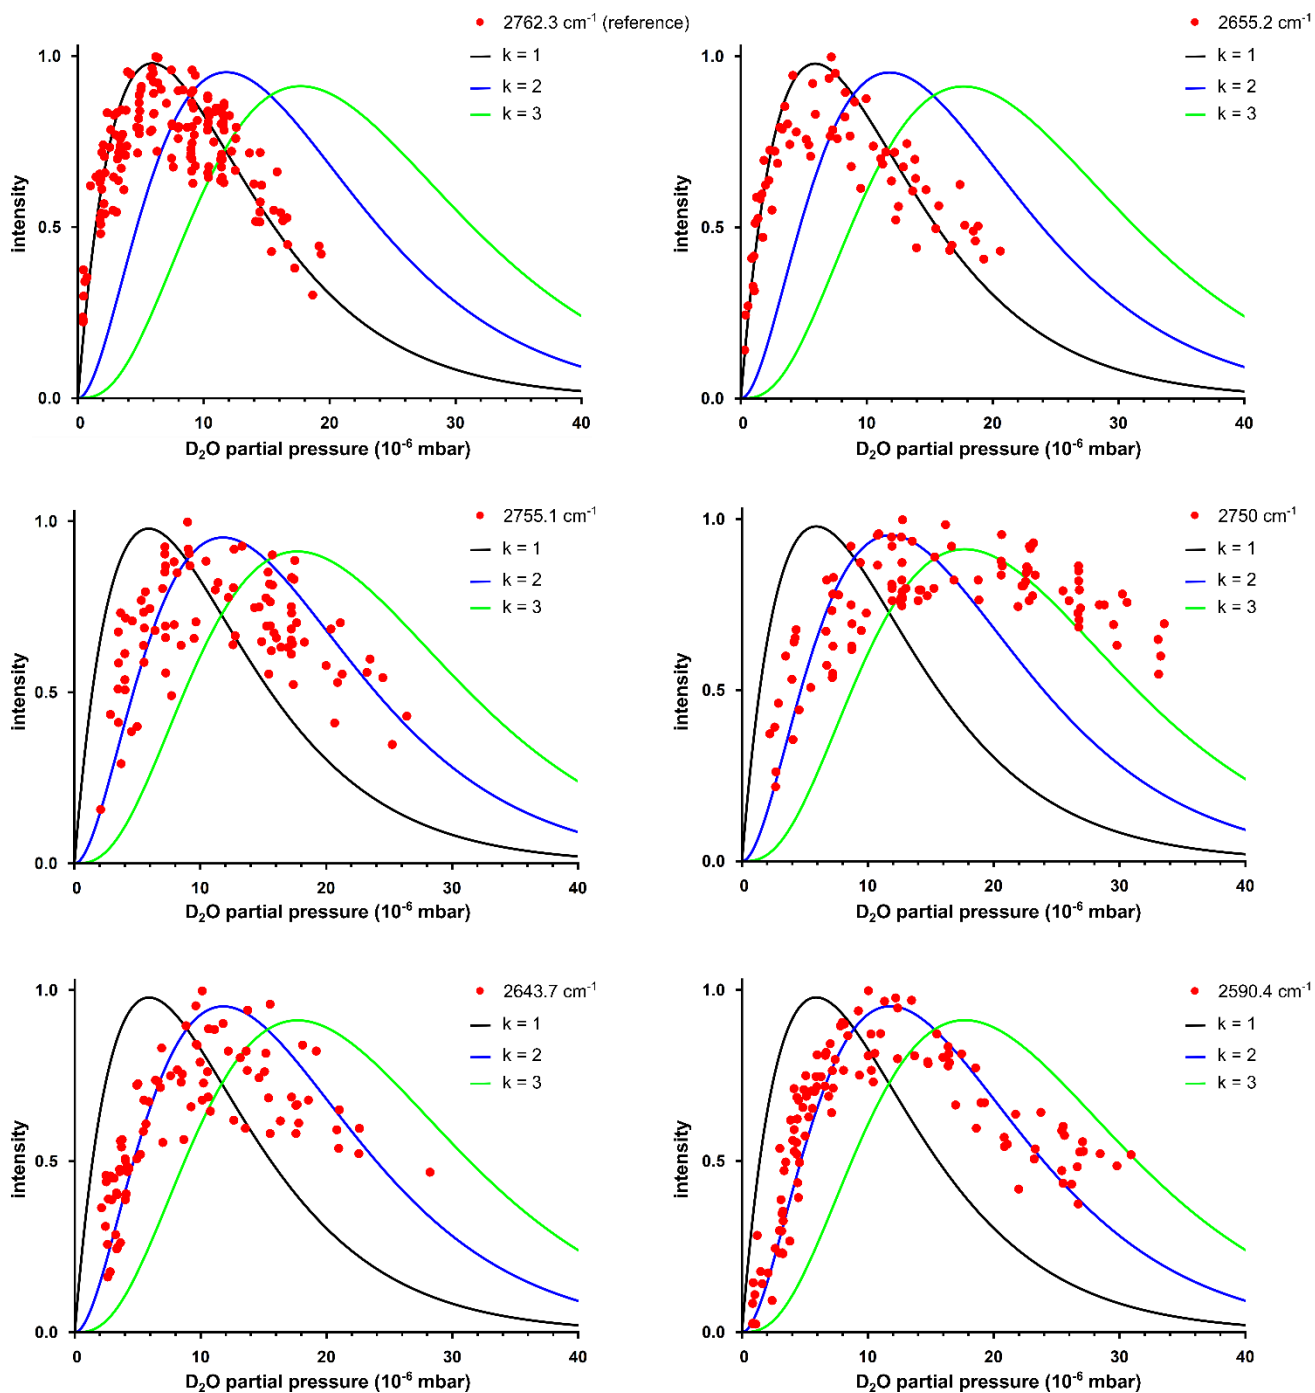

**Figure S1** D<sub>2</sub>O pick curves (at  $m/z$  128) recorded at 2762.3, 2655.2, 2755.1, 2750, 2643.7, and 2590.4 cm<sup>-1</sup>. The reference pickup curve at 2762.3 cm<sup>-1</sup> is fitted with  $k=1$  Poisson distribution (black solid line), and the predicted distributions for  $k=2$  and  $k=3$  are shown in blue and green solid lines, respectively. The top row demonstrates D<sub>2</sub>O monomer contribution, and two bottom rows shows D<sub>2</sub>O dimer contribution.

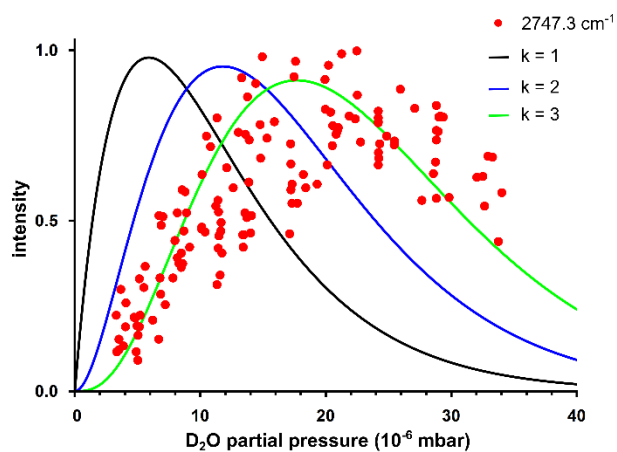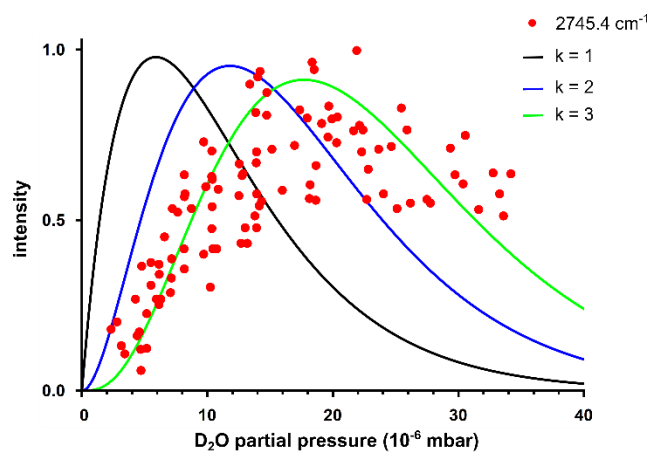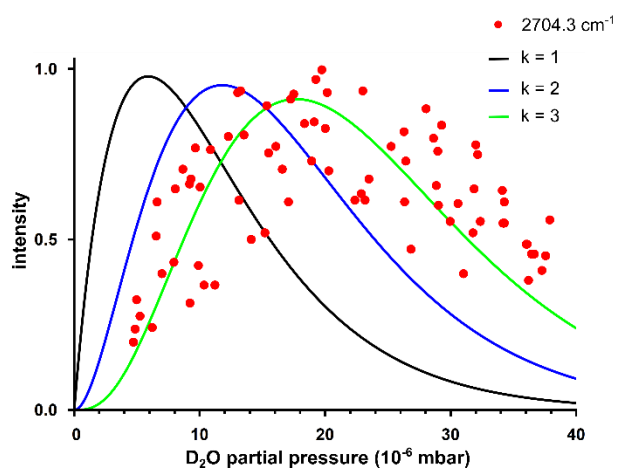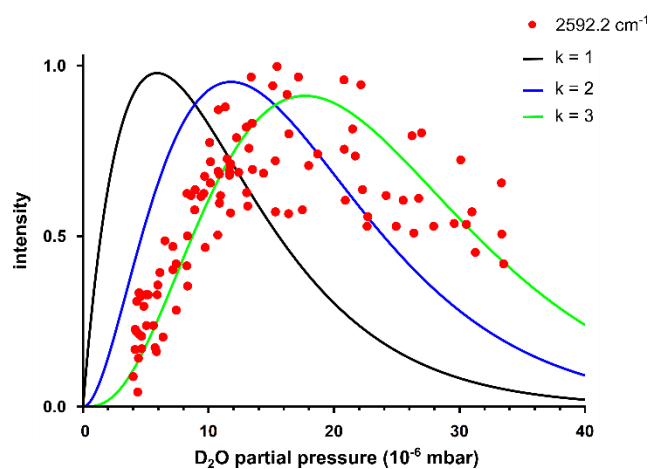

**Figure S1(continued)** D<sub>2</sub>O pick curves (at m/z 128) recorded at 2747.3, 2745.4, 2704.3, and 2592.2 cm<sup>-1</sup>. The reference D<sub>2</sub>O pickup curve at 2762.3 cm<sup>-1</sup> is fitted with  $k=1$  Poisson distribution (black solid line), and the predicted distributions for  $k=2$  and  $k=3$  are shown in blue and green solid lines, respectively. The four pickup curves show D<sub>2</sub>O trimer contribution.

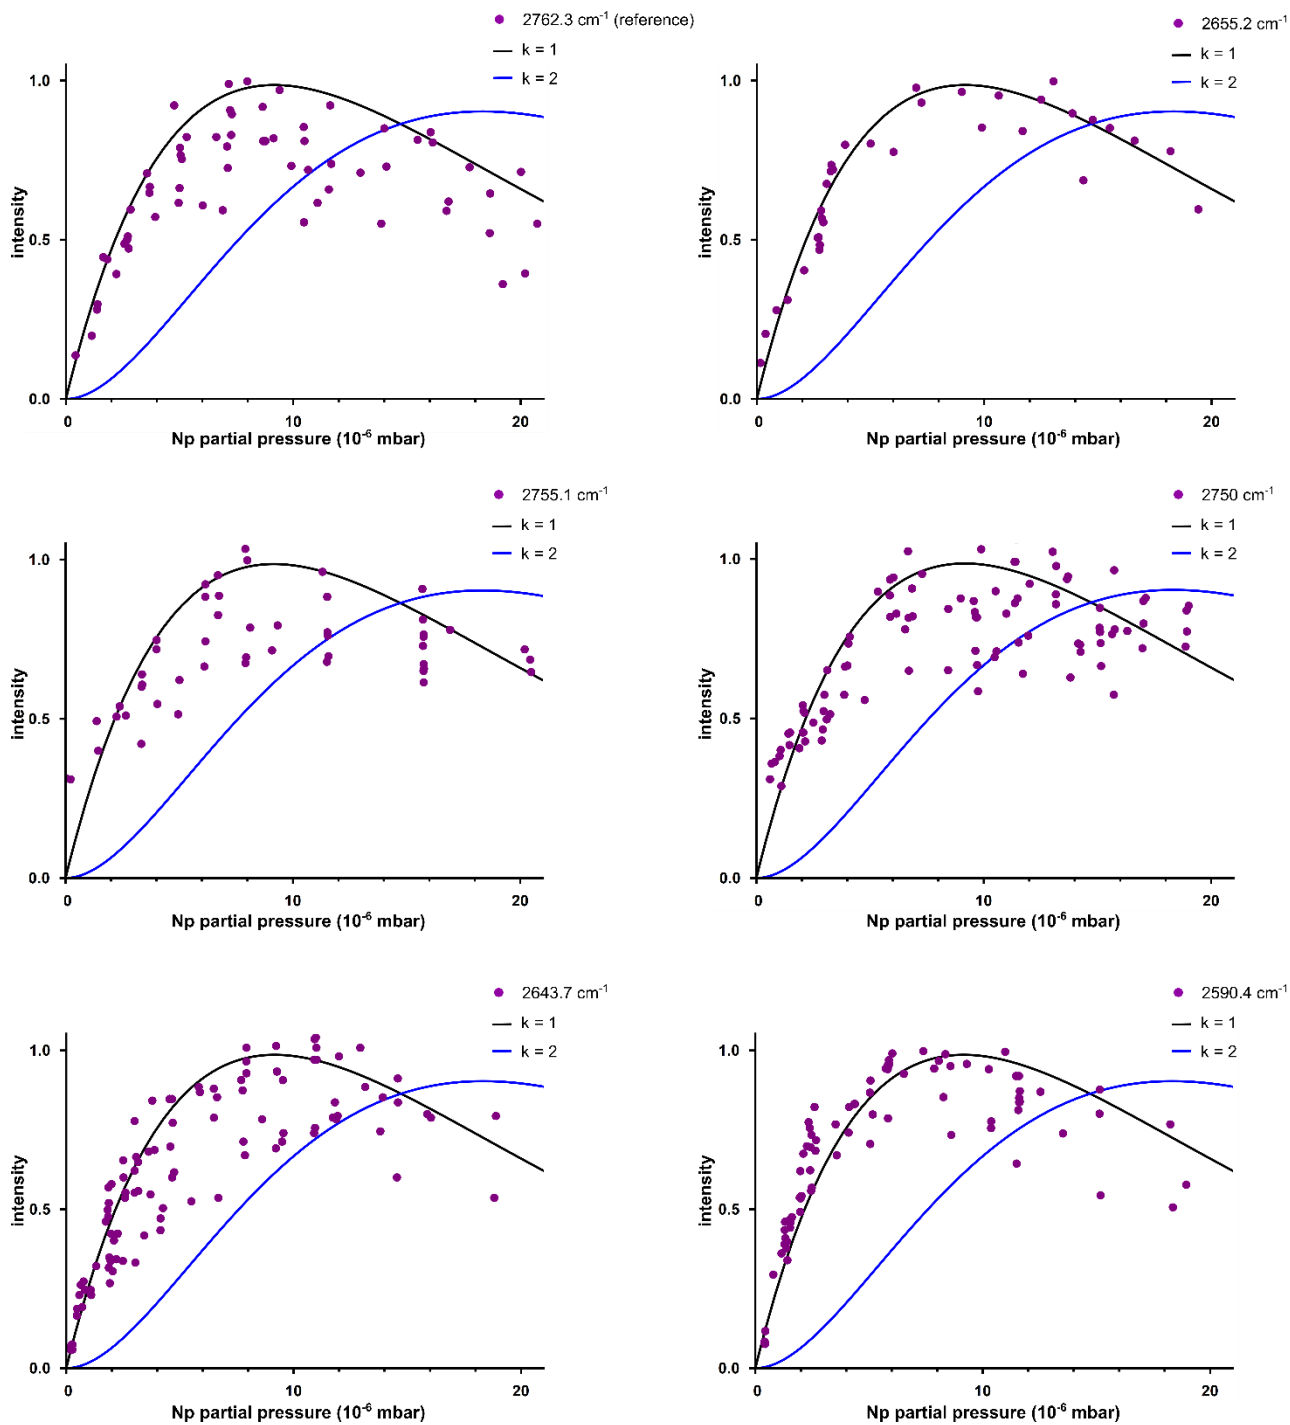

**Figure S2** Np pick curves (at  $m/z$  128) recorded at 2762.3, 2655.2, 2755.1, 2750, 2643.7, and 2590.4  $\text{cm}^{-1}$ . The reference pickup curve at 2762.3  $\text{cm}^{-1}$  is fitted with  $k=1$  Poisson distribution (black solid line), and the predicted distribution for  $k=2$  is shown in blue solid line. All these pickup curves demonstrate Np monomer contribution.

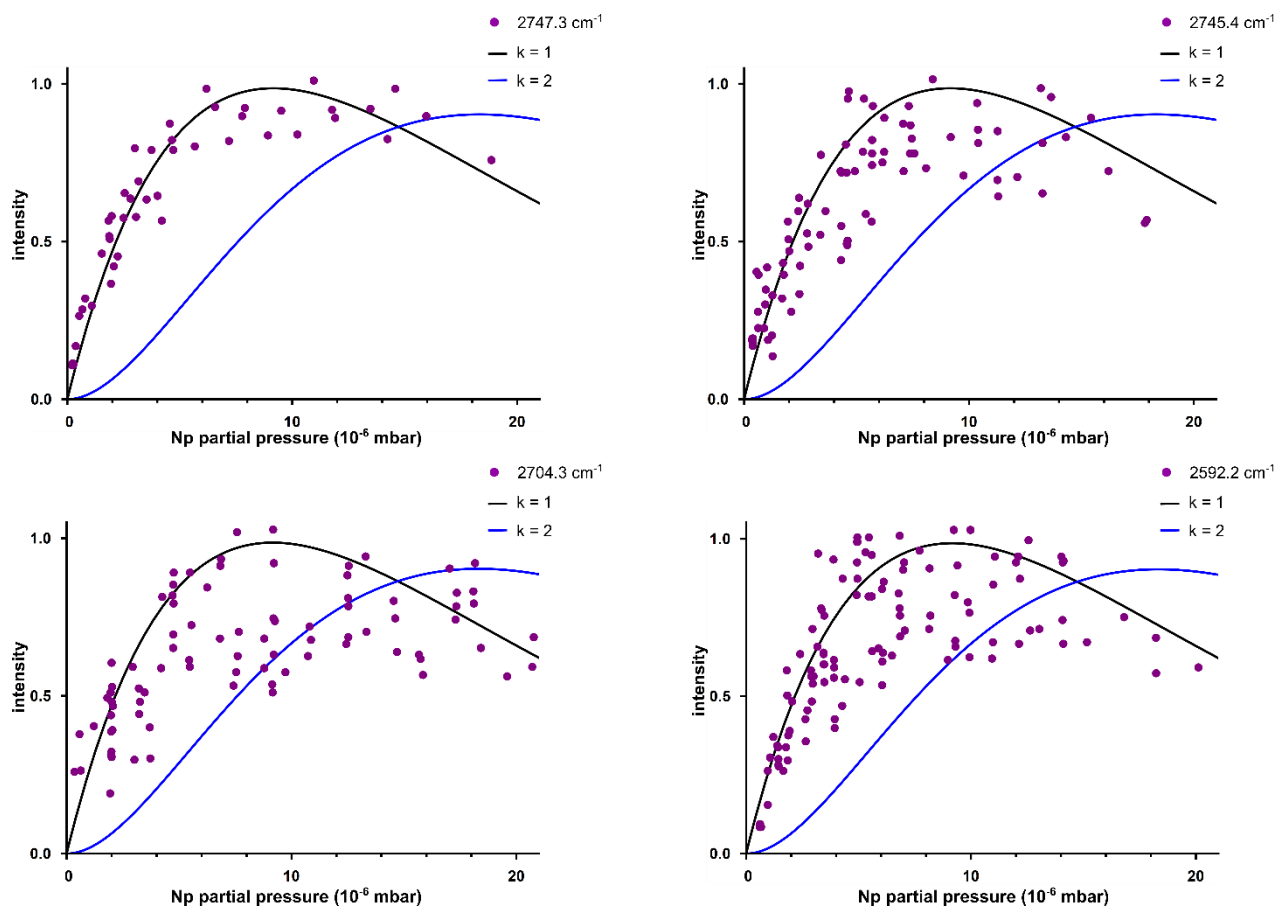

**Figure S2(continued)** Np pick curves (at  $m/z$  128) recorded at 2747.3, 2745.4, 2704.3, and 2592.2  $\text{cm}^{-1}$ . The reference Np pickup curve at 2762.3  $\text{cm}^{-1}$  is fitted with  $k=1$  Poisson distribution (black solid line), and the predicted distribution for  $k=2$  is shown in blue solid line. All these pickup curves demonstrate Np monomer contribution.

## Mass Spectra

Mass spectrum of pure helium droplets followed by electron impact ionization is shown in Figure S1a. Peaks at multiples of 4 ( $\text{He}_n^+$ ,  $n \geq 1$ ) confirm the formation of helium droplets and the peak at  $m/z$  18 indicates the presence of residual water. After introducing Np vapor at a partial pressure of  $3.0 \times 10^{-6}$  mbar from the first pickup chamber to the helium droplets, the resulting mass spectrum features characteristic peaks of Np mass spectrum at  $m/z$  128 ( $\text{Np}^+$ ), 129, 127, and 102. In addition to these peaks, introduction of  $\text{D}_2\text{O}$  at a partial pressure of  $3.5 \times 10^{-6}$  mbar to the Np-doped helium clusters leads to the enhancement of signals at  $m/z$  18 and 22 which correspond to  $\text{D}_2\text{O}^+$  and  $\text{D}_3\text{O}^+$  fragments.

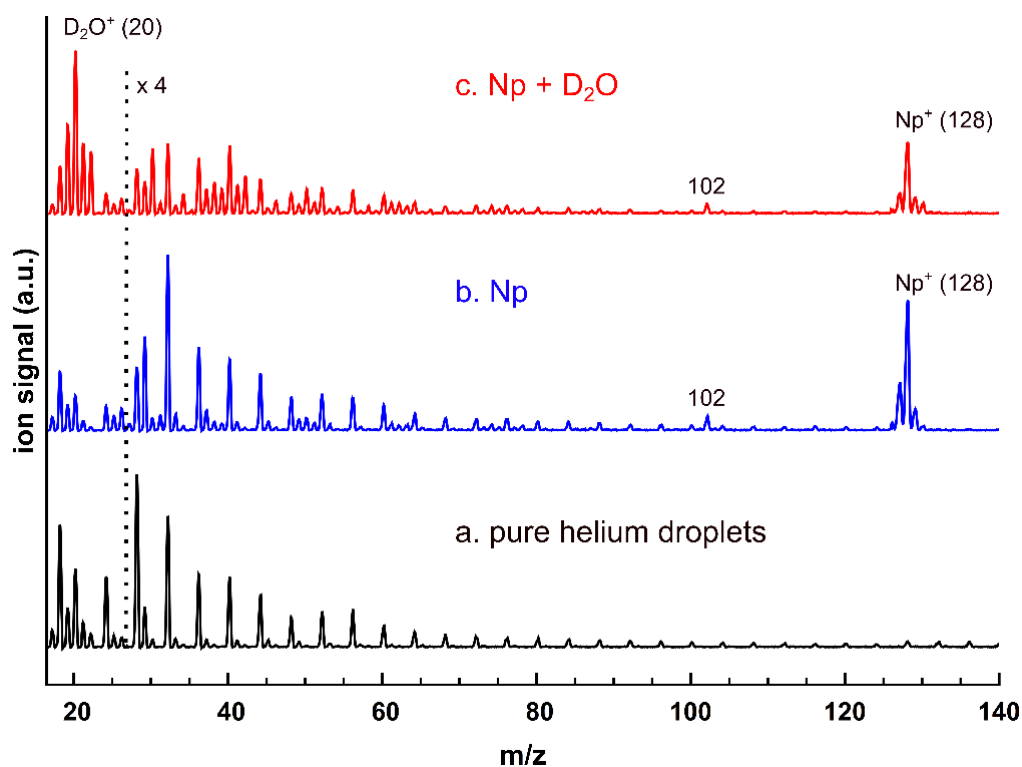

**Figure S3** Mass spectra of (a) pure helium droplets, (b) Np-doped helium droplets, and (c) Np+D<sub>2</sub>O-doped helium droplets recorded in local helium nanodroplet setup. The mass range above  $m/z$  26 is multiplied by a factor of 4 for better visualization.



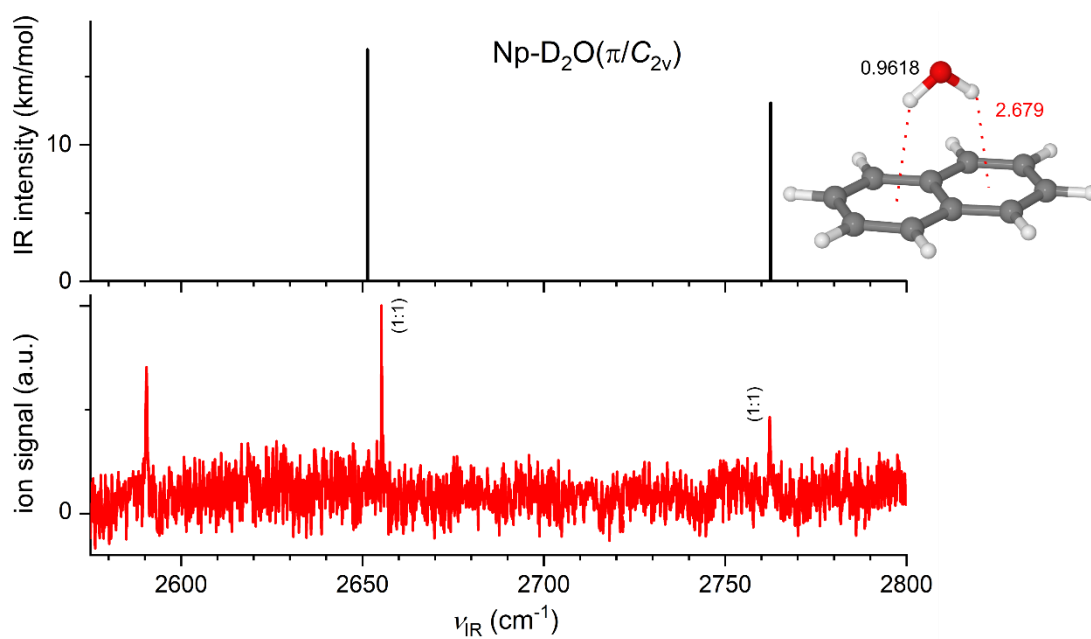

**Figure S4** Comparison of experimental IR spectrum in the O-D stretch range recorded at Np monomer and  $\text{D}_2\text{O}$  monomer partial pressures with the predicted linear IR absorption spectrum of symmetric  $\text{Np-D}_2\text{O}(\pi/C_{2v})$  isomer, which is computed as a transition state at the MP2/6-311++G(d,p) level. The observed vibrational transitions originating from the 1:1 cluster are marked in the bottom experimental spectrum. Bond lengths are provided in Å.

## Benzene-D<sub>2</sub>O( $\pi$ )

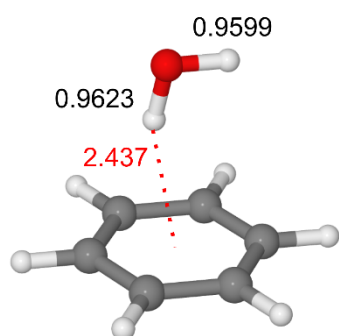

$$D_0 = 978$$

$$E_{\text{CCSD(T)}} = 698$$

## Np-D<sub>2</sub>O( $\pi$ )

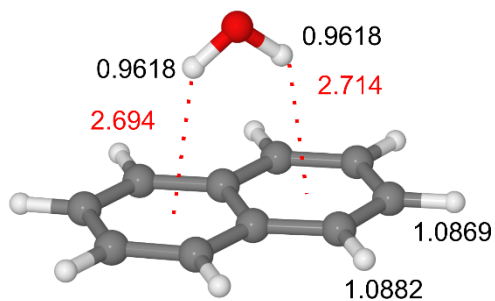

$$849$$

$$860$$

**Figure S5** Optimized structures of benzene-D<sub>2</sub>O( $\pi$ ) and Np-D<sub>2</sub>O( $\pi$ ) isomers calculated at the MP2/6-311++G(d,p) level. Binding energies ( $D_0$ ) and bond lengths are provided in cm<sup>-1</sup> and Å, respectively. The interaction energies (in blue) computed at the CCSD(T)/6-311++G(d,p) level are corrected for BSSE only and provided in cm<sup>-1</sup>.

## Optimized Cartesian Coordinates

### D<sub>2</sub>O

|          |            |             |             |
|----------|------------|-------------|-------------|
| O        | 0.00000000 | 0.00000000  | 0.11884700  |
| H(Iso=2) | 0.00000000 | 0.75335000  | -0.47538600 |
| H(Iso=2) | 0.00000000 | -0.75335000 | -0.47538600 |

### Np

|   |             |             |             |
|---|-------------|-------------|-------------|
| C | -0.01734200 | -0.70877800 | 2.43851300  |
| C | -0.05782900 | -1.40493100 | 1.24370700  |
| C | 0.00000000  | -0.71777100 | 0.00000000  |
| C | 0.00008000  | 0.71778200  | 0.00000000  |
| C | 0.05785600  | 1.40495100  | 1.24372900  |
| C | 0.01729200  | 0.70876700  | 2.43850900  |
| H | -0.08441000 | -2.49297400 | -1.24176300 |
| H | -0.05073500 | -1.24746900 | 3.38200500  |
| H | -0.08441000 | -2.49297400 | 1.24176300  |
| C | -0.05782900 | -1.40493100 | -1.24370700 |
| C | 0.05785600  | 1.40495100  | -1.24372900 |
| H | 0.08444500  | 2.49298900  | 1.24180600  |
| H | 0.05060600  | 1.24745700  | 3.38200700  |
| C | 0.01729200  | 0.70876700  | -2.43850900 |
| C | -0.01734200 | -0.70877800 | -2.43851300 |
| H | 0.08444500  | 2.49298900  | -1.24180600 |
| H | 0.05060600  | 1.24745700  | -3.38200700 |
| H | -0.05073500 | -1.24746900 | -3.38200500 |

### Np-D<sub>2</sub>O( $\pi$ )

|   |             |             |             |
|---|-------------|-------------|-------------|
| C | -2.43122000 | 0.78655800  | -0.24527800 |
| C | -1.23670800 | 1.47483400  | -0.12526400 |
| C | 0.00697500  | 0.79420600  | -0.23676600 |
| C | 0.00707100  | -0.60132800 | -0.57683000 |
| C | -1.23606400 | -1.28373200 | -0.68469400 |
| C | -2.43107600 | -0.60029400 | -0.54407000 |
| H | 1.24848000  | 2.53524800  | 0.12023000  |
| H | -3.37495800 | 1.31523200  | -0.13970100 |
| H | -1.23475500 | 2.53802800  | 0.10668500  |
| C | 1.25078400  | 1.47208300  | -0.11173400 |

|          |             |             |             |
|----------|-------------|-------------|-------------|
| C        | 1.24984700  | -1.28711900 | -0.66741300 |
| H        | -1.23323500 | -2.34770300 | -0.91297300 |
| H        | -3.37440100 | -1.13235200 | -0.63564900 |
| C        | 2.44482300  | -0.60644200 | -0.51270200 |
| C        | 2.44488800  | 0.78077100  | -0.21594600 |
| H        | 1.24736500  | -2.35124300 | -0.89511300 |
| H        | 3.38781800  | -1.14116300 | -0.59144300 |
| H        | 3.38862100  | 1.30720600  | -0.09992700 |
| O        | -0.04811800 | -0.65193000 | 2.77590700  |
| H(Iso=2) | 0.70494500  | -0.58065000 | 2.18191800  |
| H(Iso=2) | -0.79086500 | -0.50437900 | 2.18290200  |

### Np-D<sub>2</sub>O(18)

|          |             |             |             |
|----------|-------------|-------------|-------------|
| C        | 0.00273100  | -1.32266400 | 2.43825800  |
| C        | 0.02772300  | -2.02187900 | 1.24442500  |
| C        | -0.01448800 | -1.33456200 | 0.00000000  |
| C        | 0.02003200  | 0.10047700  | 0.00000000  |
| C        | -0.02034200 | 0.79442800  | 1.24153700  |
| C        | 0.00273100  | 0.09563700  | 2.43579200  |
| H        | 0.02800300  | -3.11069100 | -1.24432500 |
| H        | 0.02363800  | -1.86119300 | 3.38246800  |
| H        | 0.02800300  | -3.11069100 | 1.24432500  |
| C        | 0.02772300  | -2.02187900 | -1.24442500 |
| C        | -0.02034200 | 0.79442800  | -1.24153700 |
| H        | -0.02286800 | 1.88175100  | 1.22614400  |
| H        | -0.01848300 | 0.63511200  | 3.37955900  |
| C        | 0.00273100  | 0.09563700  | -2.43579200 |
| C        | 0.00273100  | -1.32266400 | -2.43825800 |
| H        | -0.02286800 | 1.88175100  | -1.22614400 |
| H        | -0.01848300 | 0.63511200  | -3.37955900 |
| H        | 0.02363800  | -1.86119300 | -3.38246800 |
| O        | -0.02071500 | 4.05801300  | 0.00000000  |
| H(Iso=2) | 0.73416900  | 4.65261200  | 0.00000000  |
| H(Iso=2) | -0.77641200 | 4.65157800  | 0.00000000  |

### Np-D<sub>2</sub>O(12)

|   |             |            |             |
|---|-------------|------------|-------------|
| C | -0.97643100 | 2.12017700 | 0.00078700  |
| C | 0.40506800  | 2.03832900 | -0.00233000 |

|          |             |             |             |
|----------|-------------|-------------|-------------|
| C        | 1.05677800  | 0.77469400  | 0.02884900  |
| C        | 0.25981800  | -0.41789500 | -0.03657500 |
| C        | -1.15719500 | -0.30200500 | -0.01704900 |
| C        | -1.76399000 | 0.94140900  | -0.02718200 |
| H        | 3.07692100  | 1.56237200  | 0.02932600  |
| H        | -1.46086500 | 3.09356100  | -0.01170900 |
| H        | 1.01104400  | 2.94233200  | 0.02023200  |
| C        | 2.47388500  | 0.65642000  | 0.00612600  |
| C        | 0.91237900  | -1.68133700 | -0.00419600 |
| H        | -1.77329500 | -1.19742200 | -0.03919800 |
| H        | -2.84838800 | 0.99871400  | -0.02260700 |
| C        | 2.29332400  | -1.76589600 | -0.00907100 |
| C        | 3.08077500  | -0.58686200 | 0.02082700  |
| H        | 0.30536900  | -2.58453500 | -0.02683100 |
| H        | 2.77817500  | -2.73879600 | 0.00474300  |
| H        | 4.16524800  | -0.66175300 | 0.01454800  |
| O        | -4.37178600 | -1.15106000 | 0.01974900  |
| H(Iso=2) | -4.93541800 | -1.45330000 | -0.69699900 |
| H(Iso=2) | -4.85097500 | -1.41489400 | 0.80939500  |

### **Np-D<sub>2</sub>O(23)**

|   |             |             |             |
|---|-------------|-------------|-------------|
| C | 0.01053100  | 0.70896900  | 1.69299700  |
| C | 0.00000000  | 1.40619300  | 0.49798000  |
| C | 0.02947000  | 0.71738000  | -0.74620100 |
| C | -0.02947000 | -0.71738000 | -0.74620100 |
| C | 0.00000000  | -1.40619300 | 0.49798000  |
| C | -0.01053100 | -0.70896900 | 1.69299700  |
| H | 0.01777700  | 2.49407000  | -1.98825000 |
| H | 0.00086100  | 1.23192400  | 2.64451400  |
| H | 0.01806700  | 2.49474200  | 0.49472900  |
| C | -0.00028800 | 1.40574000  | -1.99018100 |
| C | 0.00028800  | -1.40574000 | -1.99018100 |
| H | -0.01806700 | -2.49474200 | 0.49472900  |
| H | -0.00086100 | -1.23192400 | 2.64451400  |
| C | -0.01181200 | -0.70874400 | -3.18551000 |
| C | 0.01181200  | 0.70874400  | -3.18551000 |
| H | -0.01777700 | -2.49407000 | -1.98825000 |
| H | -0.00009800 | -1.24892000 | -4.12881900 |
| H | 0.00009800  | 1.24892000  | -4.12881900 |

|          |             |             |            |
|----------|-------------|-------------|------------|
| O        | 0.00000000  | 0.00000000  | 4.95375300 |
| H(Iso=2) | -0.75442700 | 0.00283200  | 5.54830600 |
| H(Iso=2) | 0.75442700  | -0.00283200 | 5.54830600 |

### **Np-(D<sub>2</sub>O)<sub>2</sub>(H1)**

|          |             |             |             |
|----------|-------------|-------------|-------------|
| C        | -2.43659300 | 1.25813800  | 0.07079200  |
| C        | -1.24173700 | 1.86490700  | 0.41887200  |
| C        | 0.00195800  | 1.27277700  | 0.06289800  |
| C        | -0.00002900 | 0.08829900  | -0.75047700 |
| C        | -1.24204300 | -0.52166700 | -1.07898800 |
| C        | -2.43591700 | 0.06670300  | -0.70001700 |
| H        | 1.24889600  | 2.77622400  | 1.00821400  |
| H        | -3.38024600 | 1.71342700  | 0.36086700  |
| H        | -1.23982600 | 2.78002000  | 1.00851800  |
| C        | 1.24767400  | 1.86110900  | 0.41857100  |
| C        | 1.23989100  | -0.52558600 | -1.07926800 |
| H        | -1.23403900 | -1.45073200 | -1.64304800 |
| H        | -3.37922400 | -0.40666800 | -0.96002300 |
| C        | 2.43572600  | 0.05904400  | -0.70075400 |
| C        | 2.44044600  | 1.25052700  | 0.07000000  |
| H        | 1.22869100  | -1.45473600 | -1.64316300 |
| H        | 3.37742500  | -0.41731000 | -0.96114500 |
| H        | 3.38566400  | 1.70282500  | 0.35965700  |
| O        | -0.00075700 | -1.30168800 | 2.11126700  |
| H(Iso=2) | 0.75198900  | -0.73086000 | 1.92145200  |
| H(Iso=2) | -0.75107500 | -0.72753300 | 1.92188600  |
| O        | -0.00585200 | -3.31579000 | 0.01840500  |
| H(Iso=2) | -0.00427200 | -2.70662700 | 0.77229600  |
| H(Iso=2) | -0.00737000 | -4.18370700 | 0.42734200  |

### **Np-(D<sub>2</sub>O)<sub>2</sub>(H2)**

|          |             |             |             |
|----------|-------------|-------------|-------------|
| O        | -1.65523900 | 2.60094300  | 0.29525800  |
| H(Iso=2) | -0.71639600 | 2.58283500  | 0.06327400  |
| O        | 1.21554500  | 2.54880000  | -0.21507800 |
| H(Iso=2) | 1.70141400  | 2.89081600  | 0.54014200  |
| H(Iso=2) | 1.59737400  | 1.67432500  | -0.35313000 |
| H(Iso=2) | -1.89875000 | 1.67189200  | 0.28291100  |
| C        | -2.42197600 | -0.87312500 | 0.58024700  |

|   |             |             |             |
|---|-------------|-------------|-------------|
| C | -1.25936900 | -0.85470800 | 1.33153100  |
| C | 0.00848300  | -0.72616300 | 0.70105100  |
| C | 0.07126400  | -0.70739800 | -0.73363500 |
| C | -1.14000200 | -0.70130300 | -1.47775900 |
| C | -2.36088900 | -0.81111200 | -0.83588000 |
| H | 1.17236200  | -0.80304200 | 2.52882300  |
| H | -3.38570100 | -0.96247800 | 1.07482900  |
| H | -1.30554600 | -0.89959400 | 2.41773200  |
| C | 1.22190100  | -0.75546800 | 1.44265200  |
| C | 1.34240300  | -0.60990500 | -1.36528600 |
| H | -1.09089600 | -0.65407700 | -2.56362100 |
| H | -3.28001200 | -0.81986300 | -1.41563000 |
| C | 2.50795300  | -0.62105000 | -0.61600800 |
| C | 2.44622900  | -0.67868100 | 0.80121600  |
| H | 1.38856700  | -0.57149100 | -2.45196800 |
| H | 3.47325800  | -0.57254700 | -1.11387900 |
| H | 3.36588900  | -0.70124100 | 1.38029900  |

**Np-(D<sub>2</sub>O)<sub>2</sub>(π/π)**

|          |             |             |             |
|----------|-------------|-------------|-------------|
| C        | 2.46548400  | -0.00473500 | -0.71032500 |
| C        | 1.27100900  | -0.03712500 | -1.40913700 |
| C        | 0.02723000  | 0.00313600  | -0.72038500 |
| C        | 0.02668000  | -0.00235000 | 0.71679800  |
| C        | 1.26988200  | 0.04377900  | 1.40622200  |
| C        | 2.46507800  | 0.01720800  | 0.70827900  |
| H        | -1.21299100 | -0.07536200 | -2.49751400 |
| H        | 3.40909400  | -0.02556600 | -1.24910500 |
| H        | 1.26896900  | -0.05935100 | -2.49698300 |
| C        | -1.21579500 | -0.05258700 | -1.40969600 |
| C        | -1.21717700 | 0.04602200  | 1.40521200  |
| H        | 1.26717200  | 0.06549900  | 2.49406600  |
| H        | 3.40836600  | 0.04261200  | 1.24745100  |
| C        | -2.41174700 | 0.01278500  | 0.70654800  |
| C        | -2.41103600 | -0.02577700 | -0.71205900 |
| H        | -1.21533300 | 0.06709600  | 2.49312200  |
| H        | -3.35553800 | 0.03596400  | 1.24501600  |
| H        | -3.35439700 | -0.05443100 | -1.25098000 |
| O        | -0.08326900 | -3.25719800 | 0.05062800  |
| H(Iso=2) | -0.79156800 | -2.65290600 | -0.19104100 |

|          |             |             |             |
|----------|-------------|-------------|-------------|
| H(Iso=2) | 0.63790500  | -2.65609200 | 0.25933100  |
| O        | -0.10371200 | 3.25726200  | -0.03943600 |
| H(Iso=2) | 0.61469900  | 2.65935400  | -0.26563900 |
| H(Iso=2) | -0.79817200 | 2.65054300  | 0.23399700  |

**Np-(D<sub>2</sub>O)<sub>3</sub>(c1)**

|          |             |             |             |
|----------|-------------|-------------|-------------|
| O        | -1.55258800 | 1.70914500  | -1.39128900 |
| H(Iso=2) | -0.64334400 | 1.60958800  | -1.72119100 |
| O        | 1.25032000  | 1.86287000  | -1.45030300 |
| H(Iso=2) | 1.09292900  | 2.28239400  | -0.59041700 |
| H(Iso=2) | 1.78981000  | 1.09646600  | -1.23158800 |
| H(Iso=2) | -1.86733700 | 0.80337900  | -1.30797000 |
| C        | -2.38062800 | -0.75949600 | 0.89331200  |
| C        | -1.22255400 | -0.27214700 | 1.47298800  |
| C        | 0.04380100  | -0.50537600 | 0.87060000  |
| C        | 0.11480000  | -1.33002000 | -0.30275400 |
| C        | -1.09367100 | -1.79081400 | -0.89461700 |
| C        | -2.31596100 | -1.53054600 | -0.29648900 |
| H        | 1.19345700  | 0.54625000  | 2.37513000  |
| H        | -3.34371000 | -0.56861000 | 1.35962300  |
| H        | -1.26834700 | 0.33329100  | 2.37523600  |
| C        | 1.25184900  | -0.06448000 | 1.47726200  |
| C        | 1.38611800  | -1.59686100 | -0.88200000 |
| H        | -1.04138800 | -2.39345400 | -1.79957000 |
| H        | -3.23088200 | -1.91090100 | -0.74436800 |
| C        | 2.54658200  | -1.14716600 | -0.27398000 |
| C        | 2.47765400  | -0.36561900 | 0.90934500  |
| H        | 1.43747500  | -2.20132200 | -1.78573000 |
| H        | 3.51417800  | -1.38179300 | -0.71098000 |
| H        | 3.39422600  | -0.02138700 | 1.38162600  |
| O        | -0.25124400 | 2.88392200  | 0.77342900  |
| H(Iso=2) | -0.93260300 | 2.54101000  | 0.16608900  |
| H(Iso=2) | -0.51431700 | 3.79274600  | 0.93740400  |

**Np-(D<sub>2</sub>O)<sub>3</sub>(c2)**

|          |             |            |             |
|----------|-------------|------------|-------------|
| O        | -2.40870600 | 0.93885800 | -1.26569100 |
| H(Iso=2) | -1.52285100 | 1.13941900 | -1.61816900 |
| O        | 0.13955200  | 1.98357300 | -1.52566300 |



|          |             |             |             |
|----------|-------------|-------------|-------------|
| H(Iso=2) | -0.04036000 | 2.34103700  | -0.64283700 |
| H(Iso=2) | 0.94420500  | 1.46859600  | -1.40184600 |
| O        | -1.41482000 | 2.50903500  | 0.84043100  |
| H(Iso=2) | -2.02072100 | 1.97844200  | 0.29586400  |
| H(Iso=2) | -2.99979700 | 1.05591500  | -2.01255500 |
| H(Iso=2) | -1.92565200 | 3.28825200  | 1.07238100  |
| C        | -1.73507300 | -1.69170700 | 0.96577200  |
| C        | -0.90784300 | -0.70933300 | 1.47835700  |
| C        | 0.35410900  | -0.44399500 | 0.88170100  |
| C        | 0.72364500  | -1.15299300 | -0.31079500 |
| C        | -0.14105100 | -2.16752100 | -0.80448400 |
| C        | -1.35764000 | -2.41322400 | -0.19411500 |
| H        | 0.92347600  | 1.11884300  | 2.26879500  |
| H        | -2.69561700 | -1.89003400 | 1.43429900  |
| H        | -1.19868700 | -0.14319800 | 2.36017000  |
| C        | 1.22629500  | 0.55950200  | 1.38663800  |
| C        | 1.99519900  | -0.89639500 | -0.89558600 |
| H        | 0.15066500  | -2.71974300 | -1.69602300 |
| H        | -2.01656700 | -3.18255800 | -0.58875100 |
| C        | 2.83336300  | 0.07535500  | -0.37231100 |
| C        | 2.45339200  | 0.79552900  | 0.79066000  |
| H        | 2.28921900  | -1.45548100 | -1.78236000 |
| H        | 3.80069900  | 0.26240900  | -0.83219000 |
| H        | 3.11741200  | 1.55506400  | 1.19558400  |

### **Np-(D<sub>2</sub>O)<sub>3</sub>(I)**

|   |             |             |             |
|---|-------------|-------------|-------------|
| C | -1.93511200 | -2.43960200 | 0.15941400  |
| C | -2.52673100 | -1.24663000 | 0.53772500  |
| C | -1.95300600 | -0.00116000 | 0.15867100  |
| C | -0.80448800 | 0.00010700  | -0.70447800 |
| C | -0.20780700 | -1.24022000 | -1.06516100 |
| C | -0.77750300 | -2.43545800 | -0.66153300 |
| H | -3.41655800 | 1.24210100  | 1.16872700  |
| H | -2.37591900 | -3.38458500 | 0.46716300  |
| H | -3.41394900 | -1.24757100 | 1.16850000  |
| C | -2.52930400 | 1.24307600  | 0.53800800  |
| C | -0.21015300 | 1.24172800  | -1.06472200 |
| H | 0.70074200  | -1.22544600 | -1.66143500 |
| H | -0.31562600 | -3.37769300 | -0.94559200 |

|          |             |             |             |
|----------|-------------|-------------|-------------|
| C        | -0.78231400 | 2.43568400  | -0.66081300 |
| C        | -1.94004000 | 2.43731300  | 0.16001400  |
| H        | 0.69844400  | 1.22890100  | -1.66100000 |
| H        | -0.32229900 | 3.37892500  | -0.94457400 |
| H        | -2.38276200 | 3.38136300  | 0.46786900  |
| O        | 0.99550900  | 0.00068500  | 1.92098100  |
| H(Iso=2) | 0.42266400  | 0.75119000  | 1.72943100  |
| H(Iso=2) | 0.42253200  | -0.74986100 | 1.72999000  |
| O        | 2.70324100  | 0.00186700  | -0.51964200 |
| H(Iso=2) | 2.27676900  | 0.00114100  | 0.34747200  |
| H(Iso=2) | 3.64627100  | 0.00258900  | -0.31619800 |
| O        | 5.57510800  | 0.00126600  | 0.19169200  |
| H(Iso=2) | 5.93344400  | -0.75746300 | 0.65904800  |
| H(Iso=2) | 5.93412600  | 0.75684300  | 0.66360700  |
